# Supplementary material for: Modelling the influence of hydrogen bond network on chemical shielding tensors description. GIAO-DFT study of WALP23 transmembrane α-helix as a test case
Source: Royal Society of Chemistry journal article supplement (doi:10.1039/b923883b), 2010-01-01
Supplement: b923883b.pdf [file b923883b.pdf]

## Electronic Supplementary Information

### Modelling the influence of hydrogen bond network on chemical shielding tensors description. GIAO - DFT study of WALP23 transmembrane $\alpha$ -helix as a test case.

Léa Rougier,<sup>a,b,c</sup> Alain Milon,<sup>b,c</sup> Valérie Réat<sup>b,c</sup> and Franck Jolibois<sup>a,c</sup>

<sup>a</sup> Laboratoire de Physique et Chimie des Nano-Objets, Université de Toulouse, INSA-UPS, 135 av. de Rangueil 31077 Toulouse France, Fax: (+33) 561559697, E-mail: franck.jolibois@univ-tlse3.fr

<sup>b</sup> Institut de Pharmacologie et Biologie Structurale, Université de Toulouse, UPS, 205 rte de Narbonne, 31077 Toulouse, France

<sup>c</sup> CNRS, UMR 5089 and UMR 5215, Toulouse, France

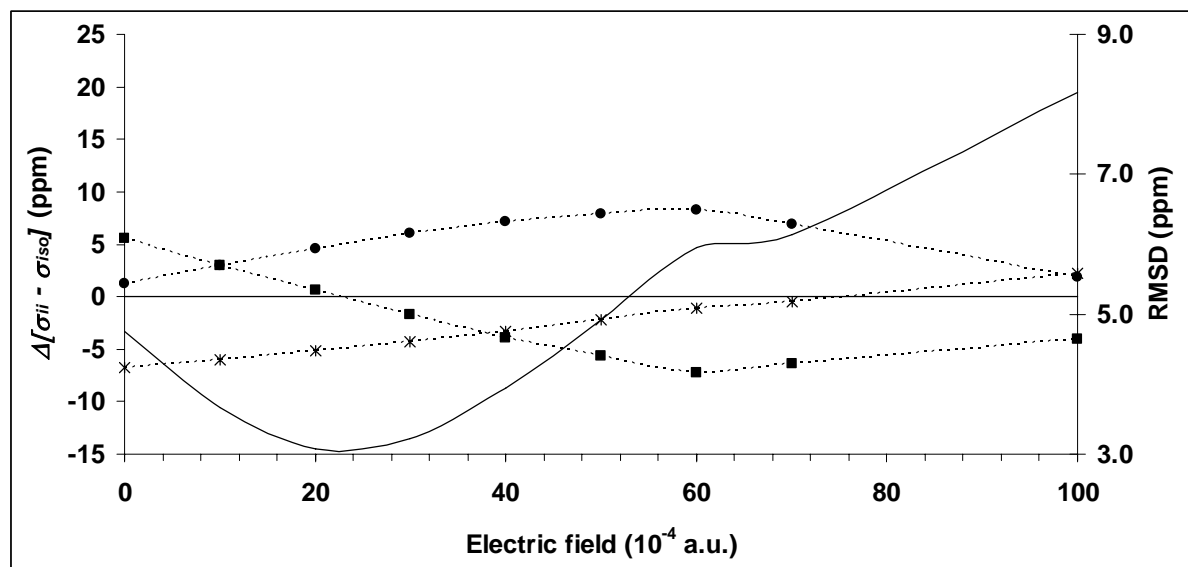

a)

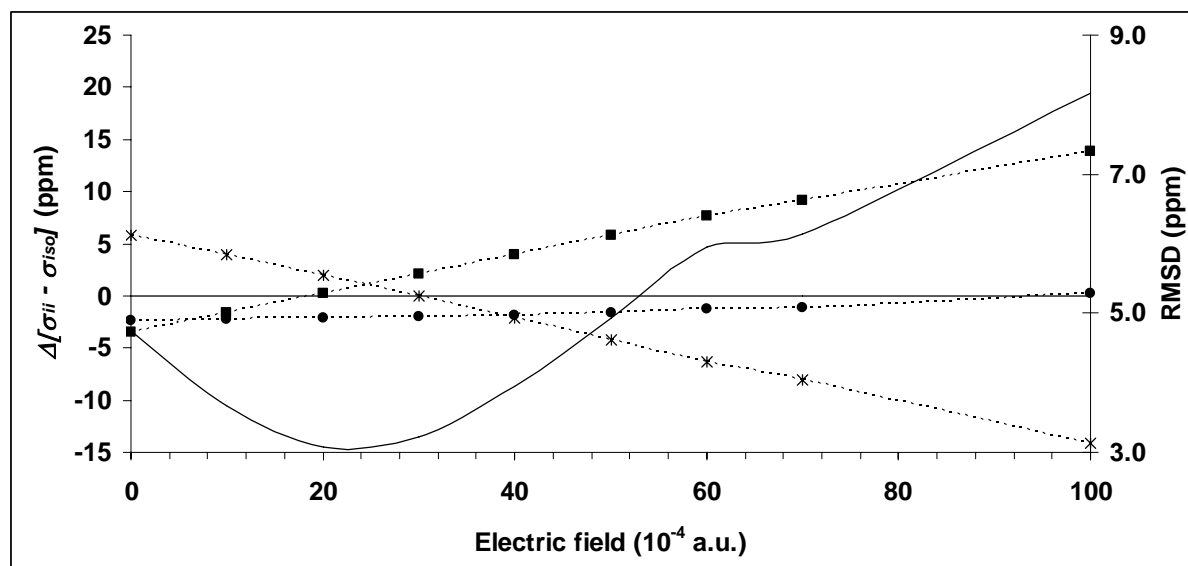

b)

**Fig.S1** Ala<sub>13</sub> <sup>13</sup>C<sub>1</sub> (a) and Leu<sub>14</sub> <sup>15</sup>N (b)  $\sigma_{ii}-\sigma_{iso}$  ( $i=1-3$ ) difference between theory and experiment as a function of electric field applied to WALP23 ( $\Delta[\sigma_{ii}-\sigma_{iso}] = (\sigma_{ii}-\sigma_{iso})_{\text{theo}} - (\sigma_{ii}-\sigma_{iso})_{\text{exp}}$ ) Circle  $i=1$ , square,  $i=2$ , star  $i=3$ . In solid line is represented the total RMSD between theory and experience calculated using the 6  $\sigma_{ii}-\sigma_{iso}$  values as a function of electric field.

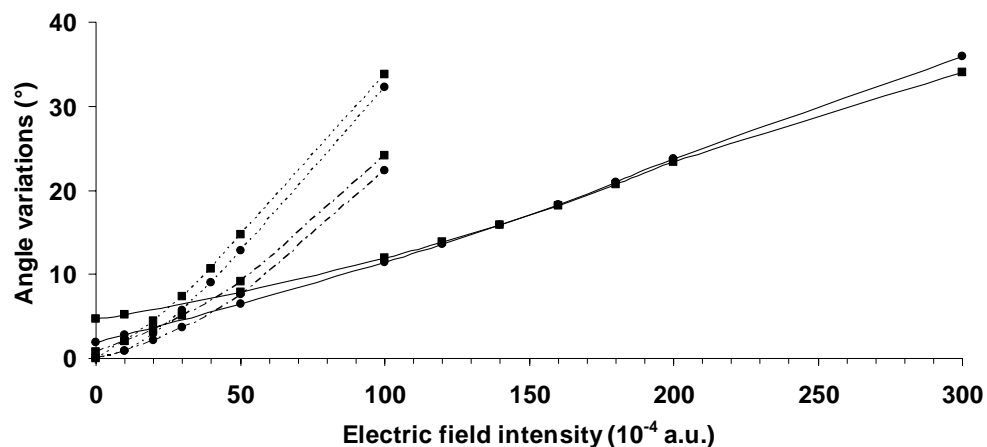

(a)

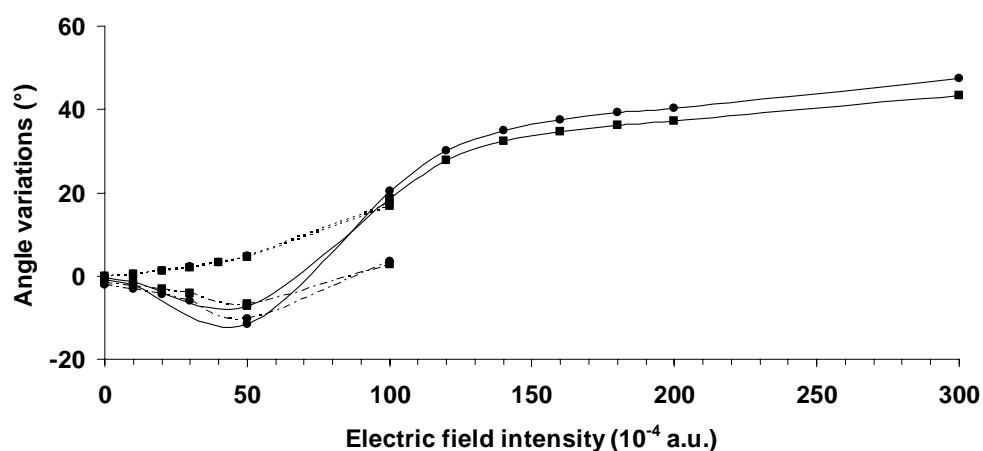

(b)

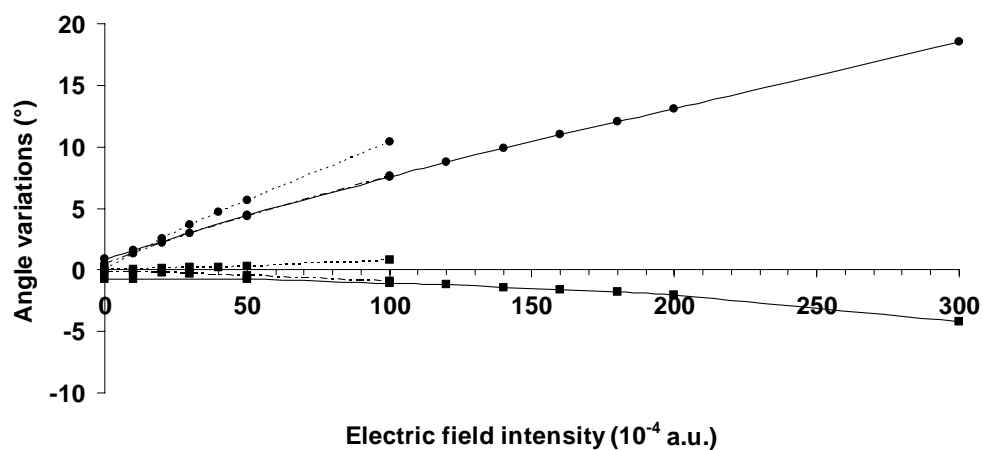

(c)

**Fig.S2** Variation of eigenvector orientation relative to molecular frame as a function of applied electric field. Reference as been set to calculation performed without electric field. a) Ala<sub>13</sub><sup>13</sup>C<sub>1</sub> alpha (square) and beta (circle) variations. b) Leu<sub>14</sub><sup>15</sup>N alpha (square) and beta (circle) variations. c) Leu<sub>14</sub><sup>15</sup>N (square) and Ala<sub>13</sub><sup>13</sup>C<sub>1</sub> (circle) gamma variation. Plain line = WALP\_7, Dashed line = WALP23 and Dashed - Point line = polyGLY-AL.
